# Supplementary material
Source: publisher figshare collection journal article supplement (https://acs.figshare.com/ndownloader/files/10170345)
Supplement: Supplementary file 1 [file 10170345]

## Supporting Information

# Surface Grafting of Ru(II) Diazonium-Based Sensitizers on Metal Oxides Enhances Alkaline Stability for Solar Energy Conversion

Rachel Bangle, Renato N. Sampaio, Ludovic Troian-Gautier\*, and Gerald J. Meyer\*

Department of Chemistry, University of North Carolina at Chapel Hill, Chapel Hill, North Carolina, 27599-3290, United States

\*Corresponding author. Email: [ludovic@live.unc.edu](mailto:ludovic@live.unc.edu), [gjmeyer@email.unc.edu](mailto:gjmeyer@email.unc.edu)

### Table of contents:

**Figure S1.** TEM images of MOx nanoparticles

**Figure S2.** Extinction coefficient of the ruthenium sensitizers

**Figure S3.** non-normalized UV-vis spectra of MOx-bound sensitizers

**Figure S4.** XPS spectra of  $\text{Ru-N}_2^+$  grafted on  $\text{SnO}_2$ ,  $\text{ZnO}$  and  $\text{ZrO}_2$ .

**Figure S5.** Full spectra of  $\text{Ru-N}_2^+$  on  $\text{TiO}_2$  under 24 hr illumination

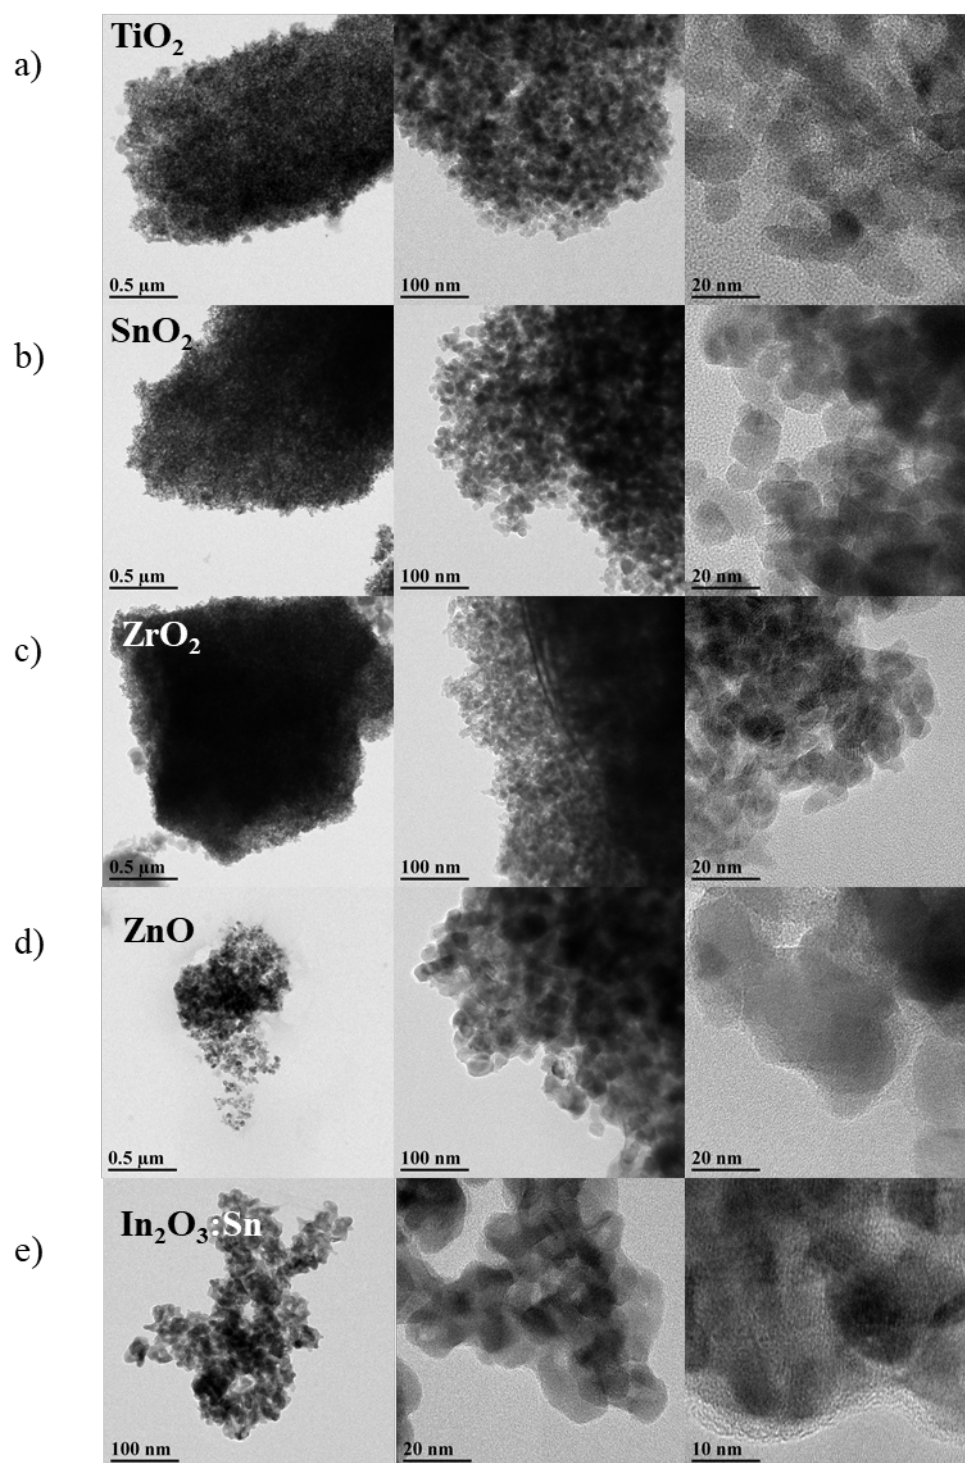

Figure S1: TEM images of MO<sub>x</sub> nanoparticles scraped from thin films. Types of MO<sub>x</sub> are separated as a) TiO<sub>2</sub>, b) SnO<sub>2</sub>, c) ZrO<sub>2</sub>, d) ZnO, and e) In<sub>2</sub>O<sub>3</sub>:Sn.

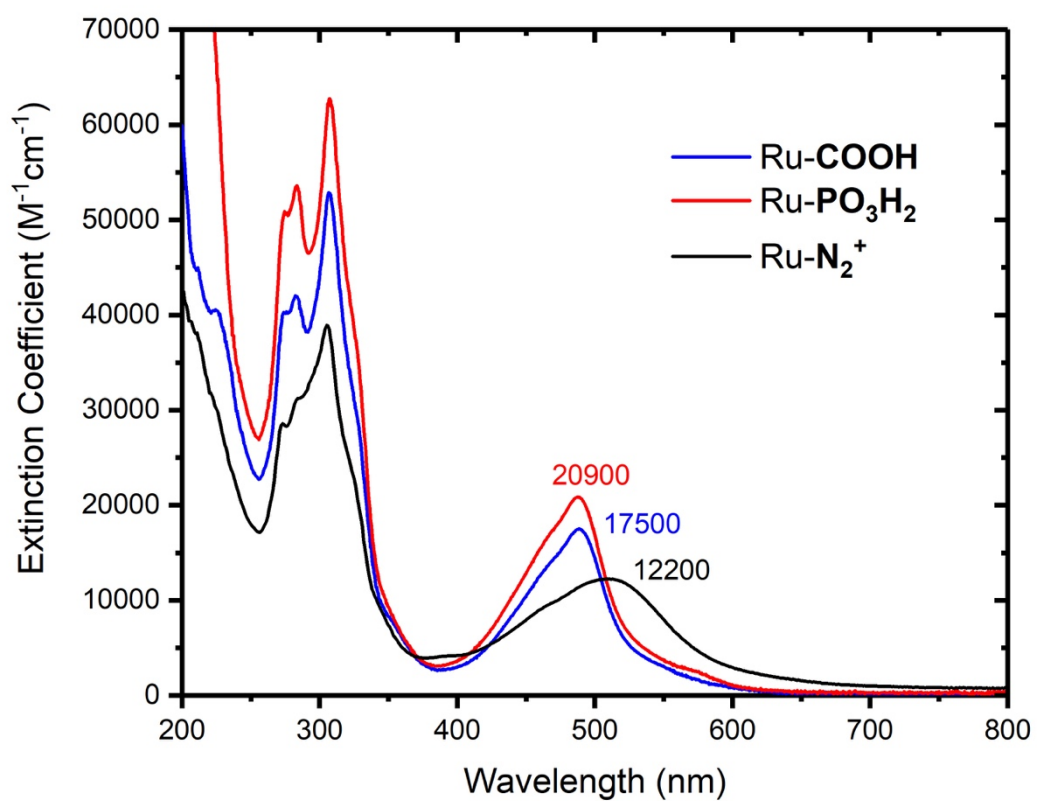

Figure S2: Extinction coefficients spectra of Ru- $\text{N}_2^+$  (black), Ru- $\text{PO}_3\text{H}_2$  (red), and Ru- $\text{COOH}$  (blue) dissolved in  $\text{CH}_3\text{CN}$ .

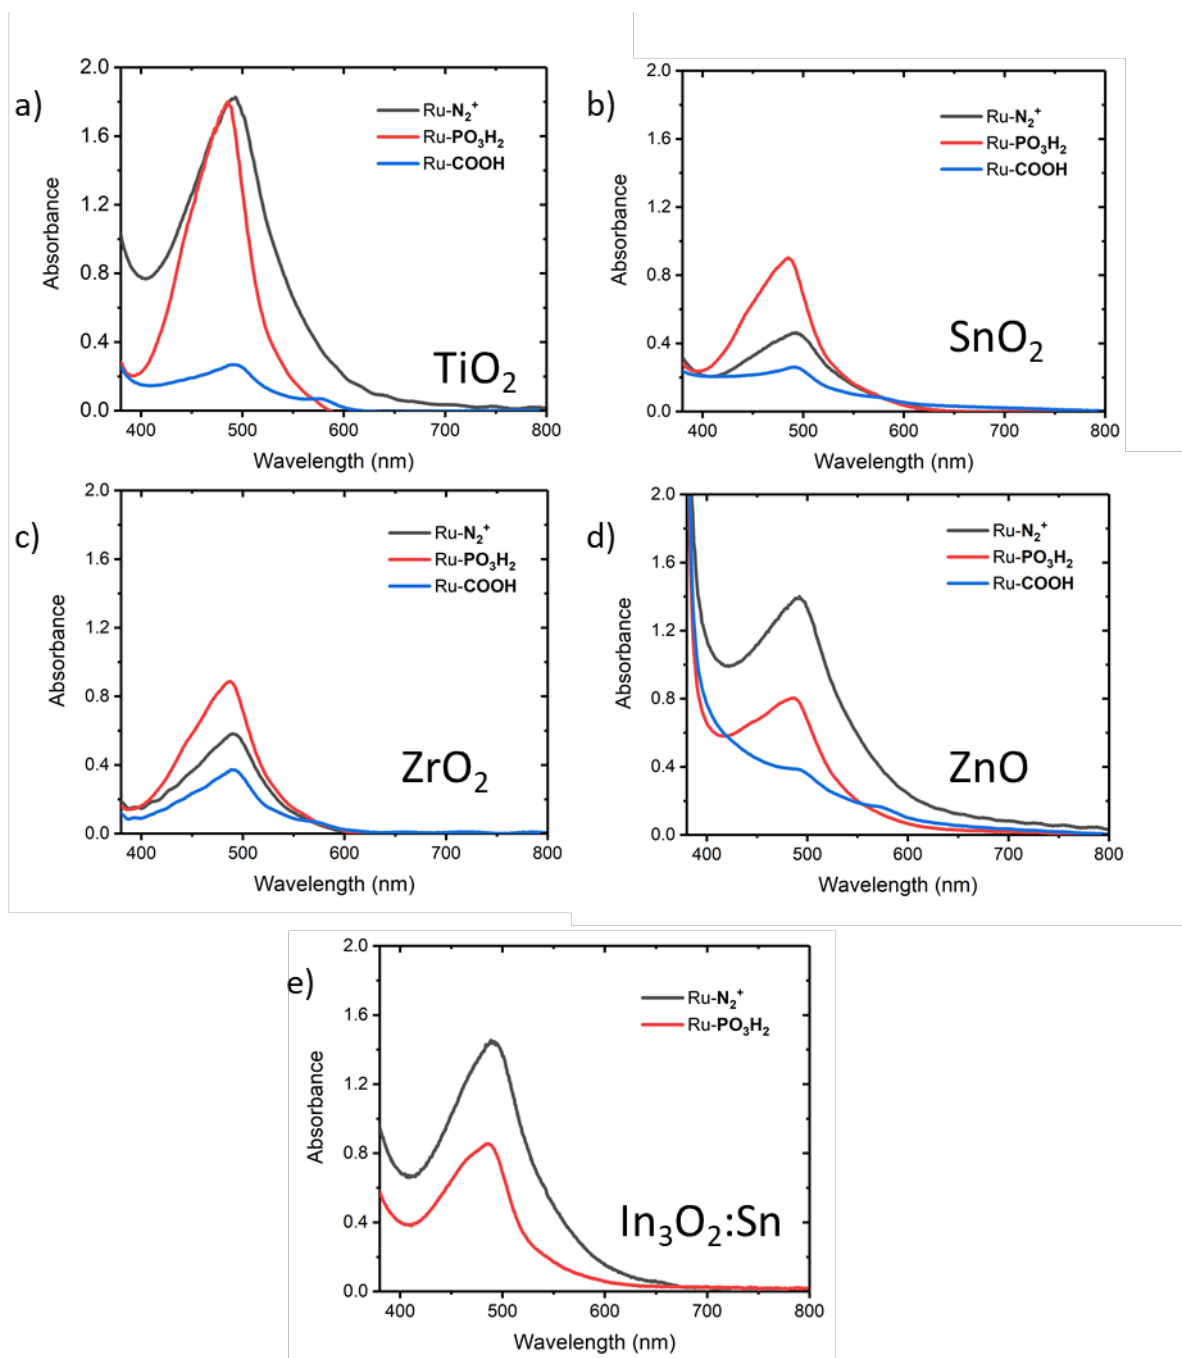

Figure S3: UV-Vis spectra of all sensitizers bound on MO<sub>x</sub> surfaces showing relative absorbance intensity. Ru-N<sub>2</sub><sup>+</sup> (black), Ru-PO<sub>3</sub>H<sub>2</sub> (red), and Ru-COOH (blue) are shown for a) TiO<sub>2</sub>, b) SnO<sub>2</sub>, c) ZrO<sub>2</sub>, d) ZnO, and e) In<sub>2</sub>O<sub>3</sub>:Sn. Ru-N<sub>2</sub><sup>+</sup> grafted films were made by electrografting at held potentials given in Table 1 using a 2 mM Ru-N<sub>2</sub><sup>+</sup> solution in 100 mM TBAClO<sub>4</sub> CH<sub>3</sub>CN for 30 min. Ru-PO<sub>3</sub>H<sub>2</sub> and Ru-COOH were adsorbed by soaking films in concentrated solutions in CH<sub>3</sub>CN.

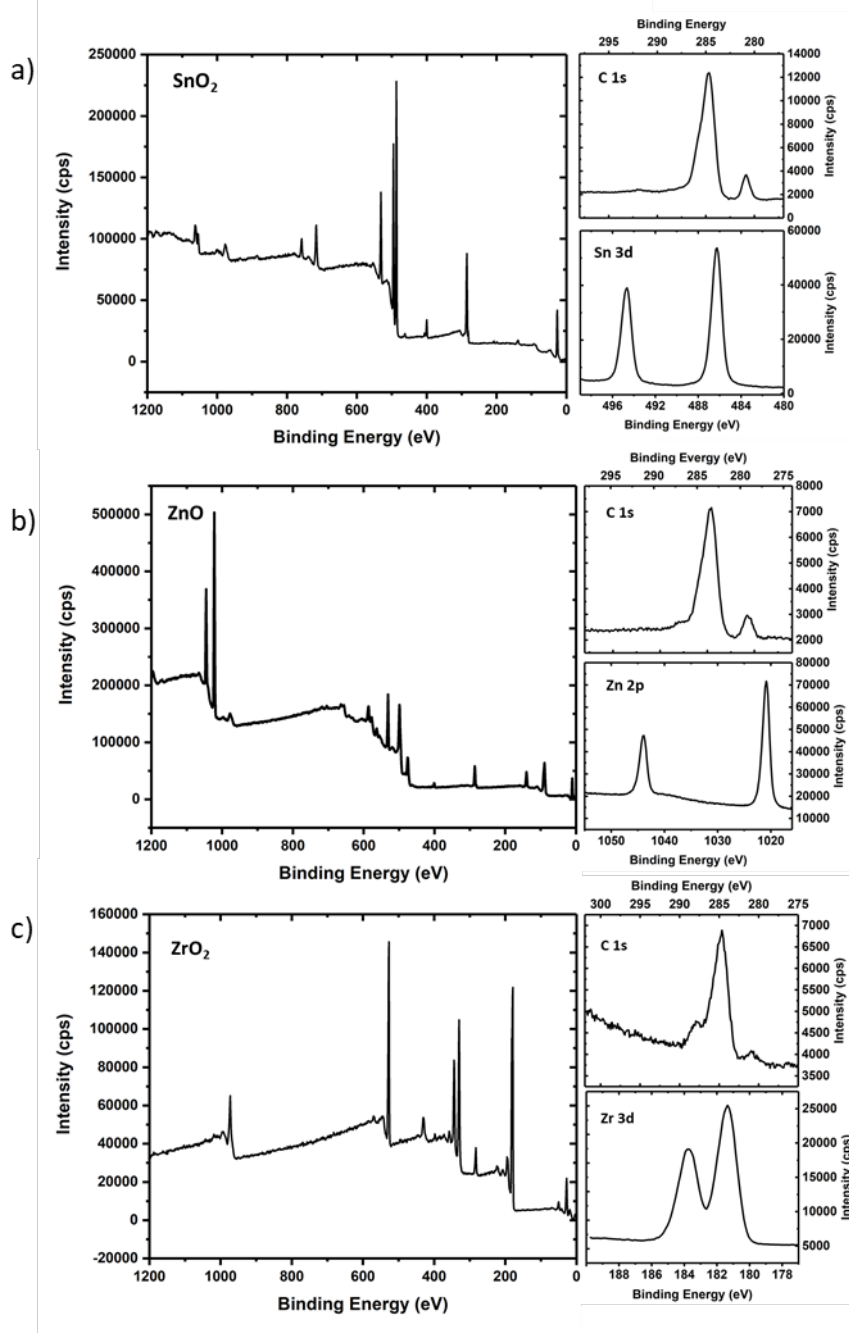

Figure S4: XPS spectra of a)  $\text{SnO}_2$ , b)  $\text{ZnO}$ , and c)  $\text{ZrO}_2$  films sensitized with  $\text{Ru-N}_2^+$ . High definition spectral regions verify the presence of the sensitizer through the presence of a Ru3d peak (C1s) and show no detectable change in oxidation state of the metal.

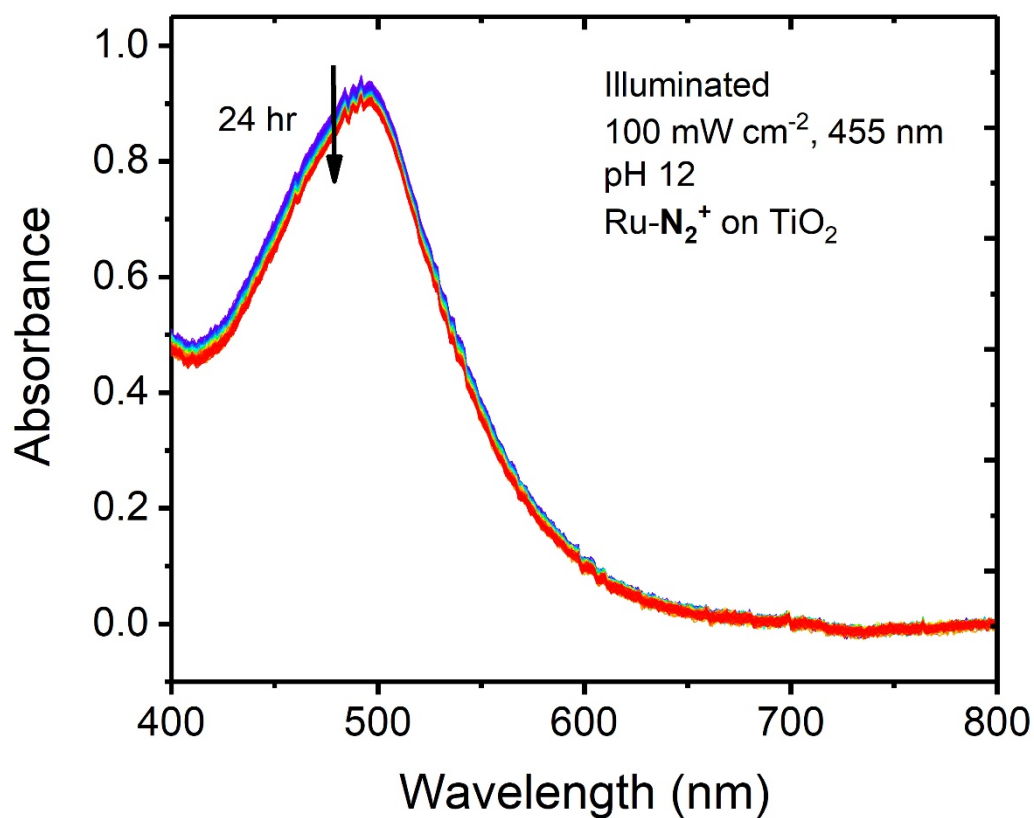

Figure S5: UV-visible spectra of Ru-N<sub>2</sub><sup>+</sup> on TiO<sub>2</sub> in pH 12 aqueous solution as it is illuminated with 455 nm, 100 mW cm<sup>-2</sup> light over 24 hrs. No spectral shift is observed, and little change in absorbance occurs.
